# Supplementary material for: Studies on the promoting effect of sulfate species in catalytic dehydrogenation of propane over Fe2O3/Al2O3 catalysts
Source: Royal Society of Chemistry journal article supplement (doi:10.1039/c4cy01163e), 2014-10-28
Supplement: c4cy01163e1.pdf [file c4cy01163e1.pdf]

#### Figure captions

Fig. S1. MS signals of CO<sub>2</sub> (—) and CO (---) over 20FeAl-N catalyst.

Fig. S2. IR spectra of 20FeAl catalysts with different precursor: (a) 20FeAl-SA (III), (b) 20FeAl-SA (II), (c) 20FeAl-SA (II) after reaction for 3 h, (d) 20FeAl-SA (II) after reaction for 24 h.

Fig. S3. H<sub>2</sub>-TPR profiles of (a) 20FeAl-N; (b) 20FeAl-SA (III); (c) 20FeAl-SA (II); (d) 20FeAl-560-SO<sub>2</sub>.

Fig. S4. Py-FT-IR spectra of (a) 20FeAl-N, (b) 20FeAl-560-SO<sub>2</sub>, (c) 20FeAl-SA (II).

Fig. S5. Reaction results over (a) 20FeSi-SA (II), (b) 20FeZr-SA (II), (c) pure Al<sub>2</sub>O<sub>3</sub> in the reactant consisting of N<sub>2</sub>, SO<sub>2</sub> and C<sub>3</sub>H<sub>8</sub> at a molar ratio of 19:1:30 (Reaction conditions: T=560 °C, P=1 atm, F<sub>C<sub>3</sub>H<sub>8</sub></sub>=12 mL/min).

Fig. S6. Al 2p spectra of unsulfated and sulfated Fe<sub>2</sub>O<sub>3</sub>/Al<sub>2</sub>O<sub>3</sub> catalysts.

Fig. S7. Propane conversion (■), propylene yield (●) and methane yield (▲) over 20FeAl-N after reaction for 3 h, then: (a) introduced SO<sub>2</sub> at a molar ratio of N<sub>2</sub>: SO<sub>2</sub>: C<sub>3</sub>H<sub>8</sub>=19:1:30; (b) pre-treated with SO<sub>2</sub> for 3 h (Reaction conditions: T=560 °C, P=1 atm, F<sub>C<sub>3</sub>H<sub>8</sub></sub>=12 mL/min).

Fig. S8. MS signal of CO<sub>2</sub> during the reaction-regeneration cycles over 20FeAl-SA (II) catalyst.

Fig. S9. Effect of reaction-regeneration-sulfuration cycles on the performance of 20FeAl-N (Reaction conditions: T=560 °C, P=1 atm, F<sub>C<sub>3</sub>H<sub>8</sub></sub>=12 mL/min).

#### Table captions

Table S1. Reaction results of the blank experiment as well as the reaction over pure Al<sub>2</sub>O<sub>3</sub> (Reaction conditions: T=560 °C, P=1 atm, F<sub>C<sub>3</sub>H<sub>8</sub></sub>=12 mL/min).

Table S2. SO<sub>2</sub>-TG results at different temperature.

Table S3. The areas of reduction peaks quantified by peak deconvolution for sulfated and

unsulfated catalysts

Table S4. S 2p peak fitting calculation and analytical data of surface content (Fe, Al and S).

Table S5. Textural properties of fresh, reacted, regenerated 20FeAl-SA (II) and 20FeAl-560-SO<sub>2</sub>.

Table S1

Reaction results of the blank experiment as well as the reaction over pure Al<sub>2</sub>O<sub>3</sub> (Reaction conditions: T=560 °C, P=1 atm, F<sub>C<sub>3</sub>H<sub>8</sub></sub>=12 mL/min).

| Catalyst                       | Conversion, wt% | Yield of propylene,<br>wt% | Yield of methane,<br>wt% |
|--------------------------------|-----------------|----------------------------|--------------------------|
| Blank                          | 1.13            | 0.4                        | 0.15                     |
| Al <sub>2</sub> O <sub>3</sub> | 1.05            | 0.47                       | 0.10                     |

Table S2

SO<sub>2</sub>-TG results at different temperature

| T, °C                               | Weight increase rate, wt% |
|-------------------------------------|---------------------------|
| 450                                 | 19.1                      |
| 560                                 | 11.9                      |
| 600                                 | 8.6                       |
| Al <sub>2</sub> O <sub>3</sub> -700 | 5.5                       |
| Fe <sub>2</sub> O <sub>3</sub> -700 | 2.8                       |

Table S3

The areas of reduction peaks quantified by peak deconvolution for sulfated and unsulfated catalysts

| Catalyst                   | Peak 1 | Peak 2' | Peak 2  | Peak 3  |
|----------------------------|--------|---------|---------|---------|
| 20FeAl-N                   | 2695.7 | --      | 2204.8  | 13627.2 |
| 20FeAl-SA (III)            | 40.5   | --      | 6917.5  | 10923.8 |
| 20FeAl-SA (II)             | 76.9   | --      | 12386.4 | 9456.8  |
| 20FeAl-560-SO <sub>2</sub> | 134.0  | 1702.5  | 4531.9  | 10994.8 |

Table S4

S 2p peak fitting calculation and analytical data of surface content (Fe, Al and S)

| Catalyst                                             | E <sub>b</sub> , eV | % area       | Surface content<br>of S, % |
|------------------------------------------------------|---------------------|--------------|----------------------------|
| 20FeAl-560-SO <sub>2</sub>                           | 169.8               | -            | 1.6                        |
| 20FeAl-SA (II)                                       | 169.8               | -            | 2.2                        |
| 20FeAl-SA (II) after<br>reaction for 3h              | 168.9<br>162.5      | 57.5<br>42.5 | 0.8                        |
| 20FeAl-SA (II) after<br>reaction for 24h             | 168.7<br>162.4      | 51.1<br>48.9 | 0.8                        |
| 20FeAl-SA (III) after<br>reaction for 24h            | 168.5<br>161.7      | 44.5<br>55.5 | 0.9                        |
| 20FeAl-560-SO <sub>2</sub> after<br>reaction for 6 h | 168.9<br>162.2      | 62.2<br>37.8 | 1.0                        |

Table S5

Textural properties of fresh, reacted, regenerated 20FeAl-SA (II) and 20FeAl-560-SO<sub>2</sub>

| Catalysts                                            | S <sub>BET</sub> ,<br>m <sup>2</sup> /g | Pore diameter,<br>nm | Particle volume,<br>cm <sup>3</sup> /g |
|------------------------------------------------------|-----------------------------------------|----------------------|----------------------------------------|
| Fresh 20FeAl-SA (II)                                 | 125.4                                   | 6.53                 | 0.263                                  |
| 20FeAl-SA (II) after<br>reaction for 24 h            | 108.3                                   | 5.62                 | 0.170                                  |
| Regenerated once 20FeAl-<br>SA (II)                  | 117.0                                   | 6.50                 | 0.258                                  |
| Fresh 20FeAl-560-SO <sub>2</sub>                     | 149.1                                   | 6.60                 | 0.258                                  |
| Reacted (one cycle) 20FeAl-<br>560-SO <sub>2</sub>   | 140.8                                   | 5.65                 | 0.249                                  |
| Regenerated once 20FeAl-<br>560-SO <sub>2</sub>      | 145.8                                   | 6.58                 | 0.254                                  |
| Reacted (four cycle)<br>20FeAl-560-SO <sub>2</sub>   | 136.9                                   | 6.44                 | 0.245                                  |
| Regenerated four times<br>20FeAl-560-SO <sub>2</sub> | 142.2                                   | 6.50                 | 0.249                                  |

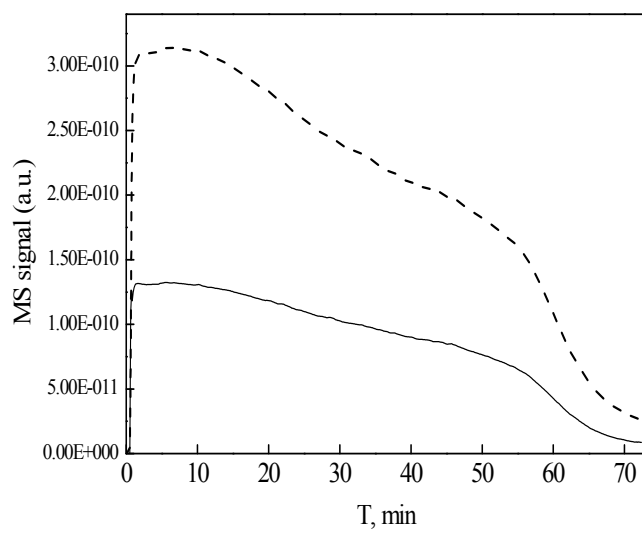

Fig. S1. MS signals of CO<sub>2</sub> (—) and CO (---) over 20FeAl-N catalyst.

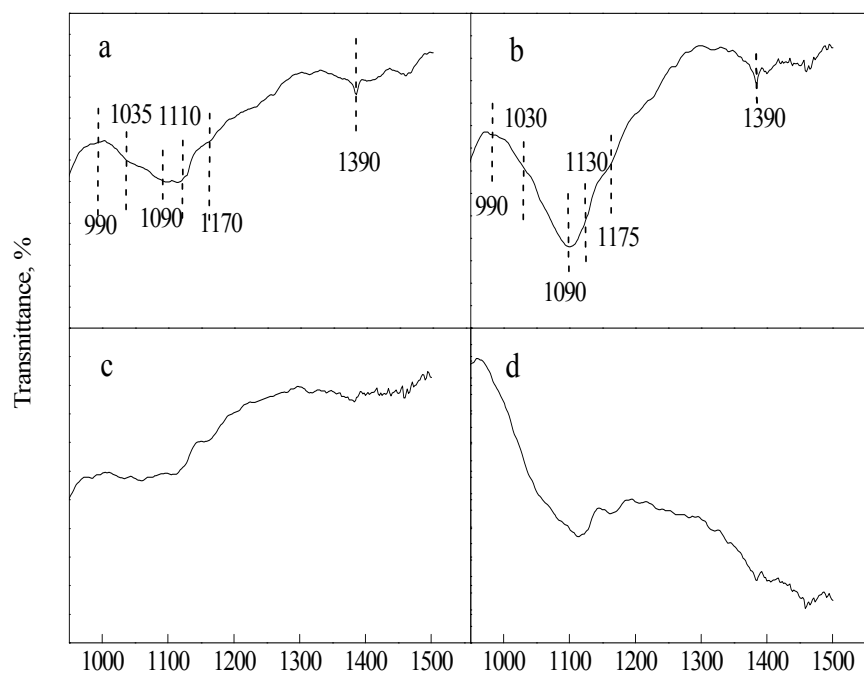

Fig. S2. IR spectra of (a) 20FeAl-SA (III), (b) 20FeAl-SA (II), (c) 20FeAl-SA (II) after reaction for 3 h, (d) 20FeAl-SA (II) after reaction for 24 h.

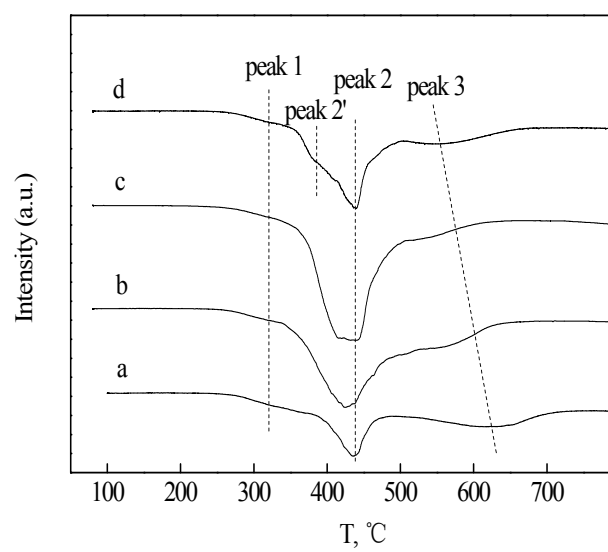

Fig. S3. H<sub>2</sub>-TPR profiles of (a) 20FeAl-N; (b) 20FeAl-SA (III); (c) 20FeAl-SA (II); (d) 20FeAl-560-SO<sub>2</sub>.

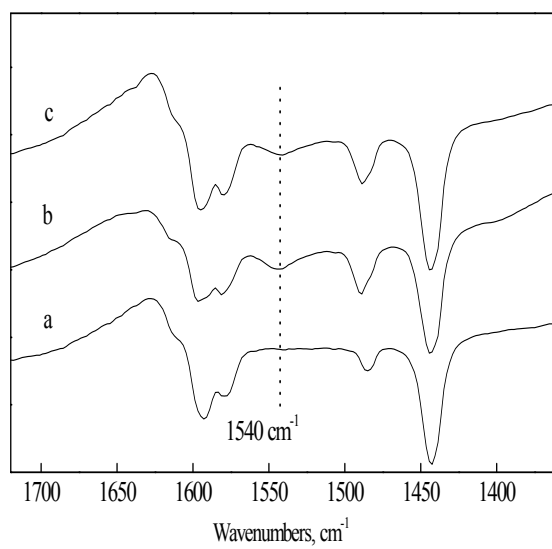

Fig. S4. Py-FT-IR spectra of (a) 20FeAl-N, (b) 20FeAl-560-SO<sub>2</sub>, (c) 20FeAl-SA (II) (desorption at 200 °C).



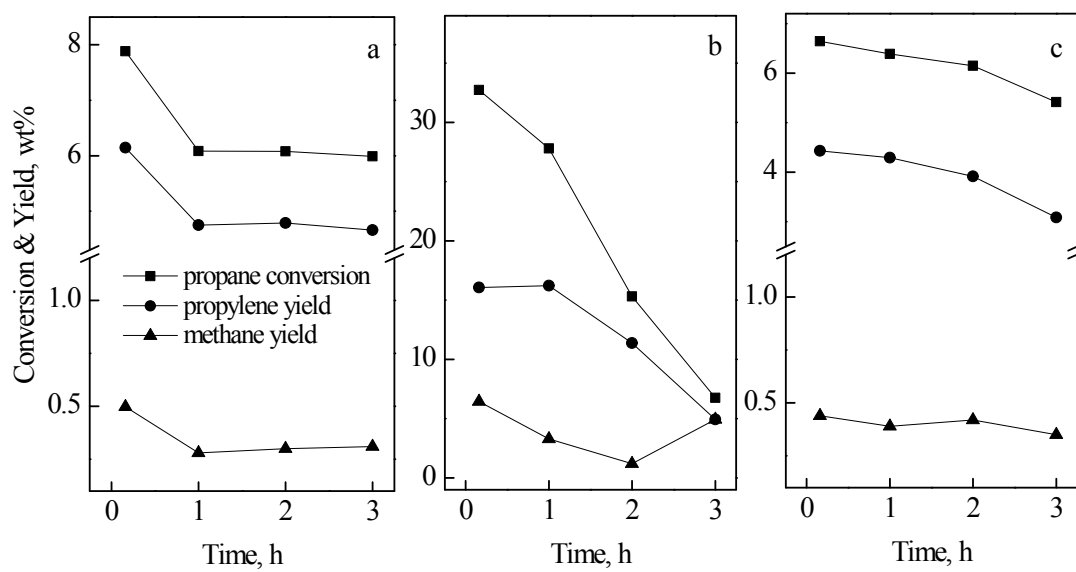

Fig. S5. Reaction results over (a) 20FeSi-SA (II), (b) 20FeZr-SA (II), (c) pure Al<sub>2</sub>O<sub>3</sub> in the reactant consisting of N<sub>2</sub>, SO<sub>2</sub> and C<sub>3</sub>H<sub>8</sub> at a molar ratio of 19:1:30 (Reaction conditions: T=560 °C, P=1 atm, F<sub>C<sub>3</sub>H<sub>8</sub></sub>=12 mL/min).

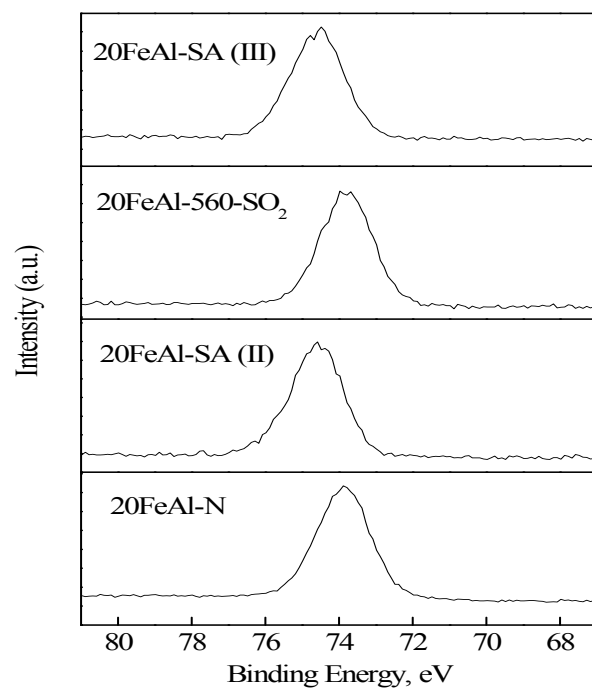

Fig. S6. Al 2p spectra of unsulfated and sulfated Fe<sub>2</sub>O<sub>3</sub>/Al<sub>2</sub>O<sub>3</sub> catalysts.

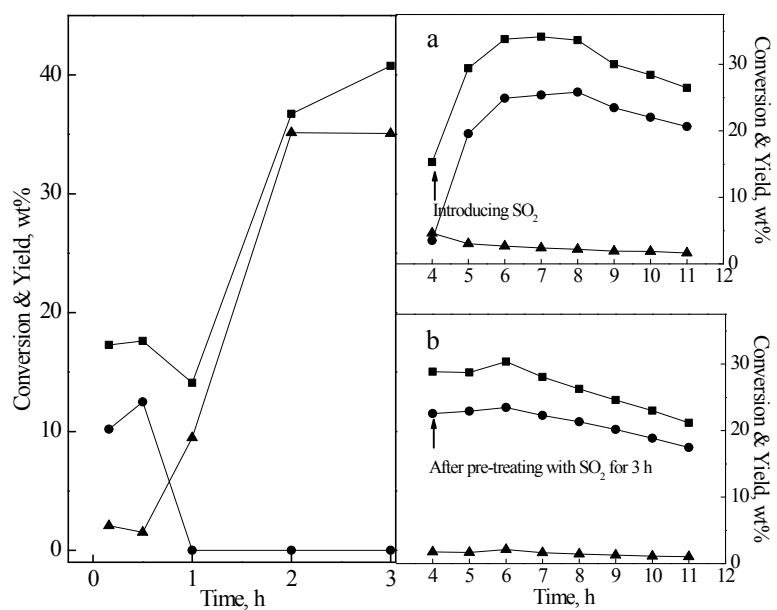

Fig. S7. Propane conversion (■), propylene yield (●) and methane yield (▲) over 20FeAl-N after reaction for 3 h, then: (a) introduced SO<sub>2</sub> at a molar ratio of N<sub>2</sub>: SO<sub>2</sub>: C<sub>3</sub>H<sub>8</sub>=19:1:30; (b) pre-treated with SO<sub>2</sub> for 3 h (Reaction conditions: T=560 °C, P=1 atm, F<sub>C<sub>3</sub>H<sub>8</sub></sub>=12 mL/min).

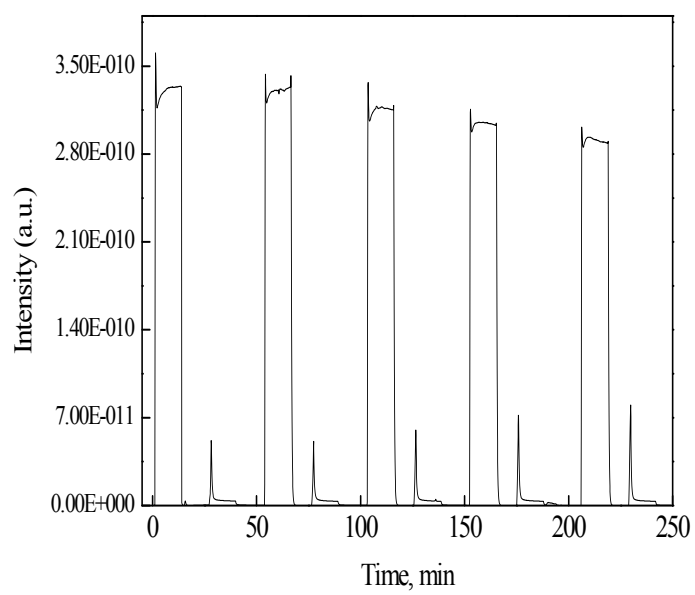

Fig. S8. MS signal of CO<sub>2</sub> during the reaction-regeneration cycles over 20FeAl-SA (II) catalyst.

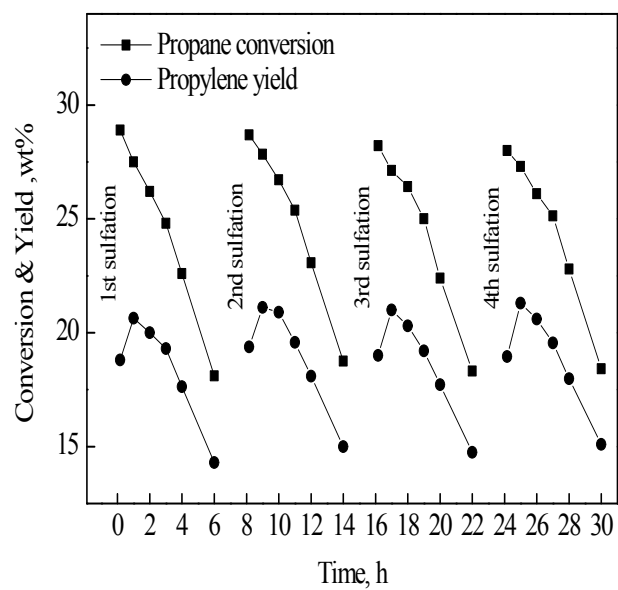

Fig. S9. Effect of reaction-regeneration-sulfuration cycles on the performance of 20FeAl-N (Reaction conditions: T=560 °C, P=1 atm,  $F_{C_3H_8}$ =12 mL/min).
